# Supplementary material for: WNT/β-catenin pathway activation in Myc immortalised cerebellar progenitor cells inhibits neuronal differentiation and generates tumours resembling medulloblastoma
Source: PubMed Central journal article supplement — Br J Cancer. 2012 Aug 28;107(7):1144–52. doi: 10.1038/bjc.2012.377 (PMC3461168; doi:10.1038/bjc.2012.377), 2012-08-28
Supplement: bjc2012377x1.pdf [file bjc2012377x1.pdf]

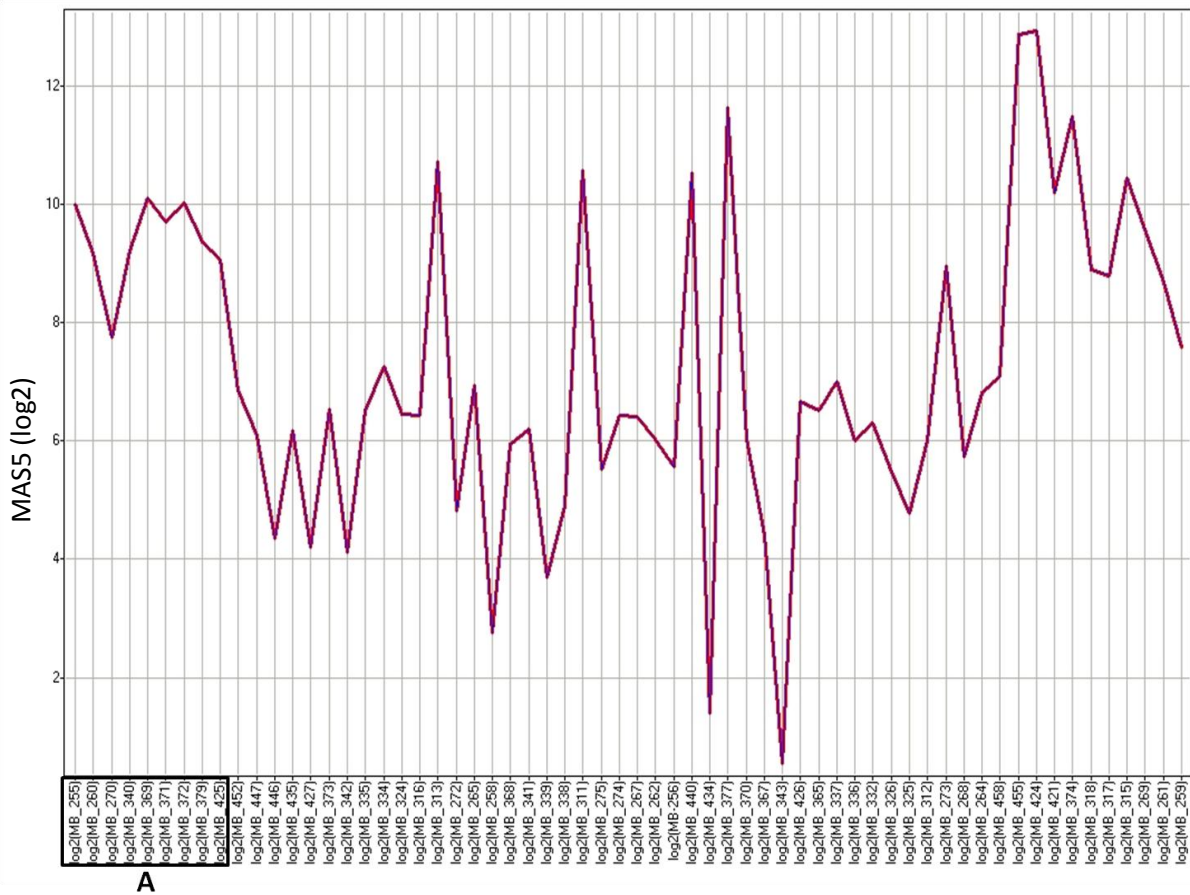

**Supplemental figure 1** MYC expression in medulloblastoma tumors, taken from previously published gene expression array data [Kool et al. 2008 (GSE10237)]. A significantly higher level of MYC expression can be seen in the tumors with WNT/ $\beta$ -catenin pathway activation (**A**) compared to the rest of the tumors (ttest  $p = 0.006$ ).
