# Supplementary material for: WNT/β-catenin pathway activation in Myc immortalised cerebellar progenitor cells inhibits neuronal differentiation and generates tumours resembling medulloblastoma
Source: PubMed Central journal article supplement — Br J Cancer. 2012 Aug 28;107(7):1144–52. doi: 10.1038/bjc.2012.377 (PMC3461168; doi:10.1038/bjc.2012.377), 2012-08-28
Supplement: bjc2012377x2.pdf [file bjc2012377x2.pdf]

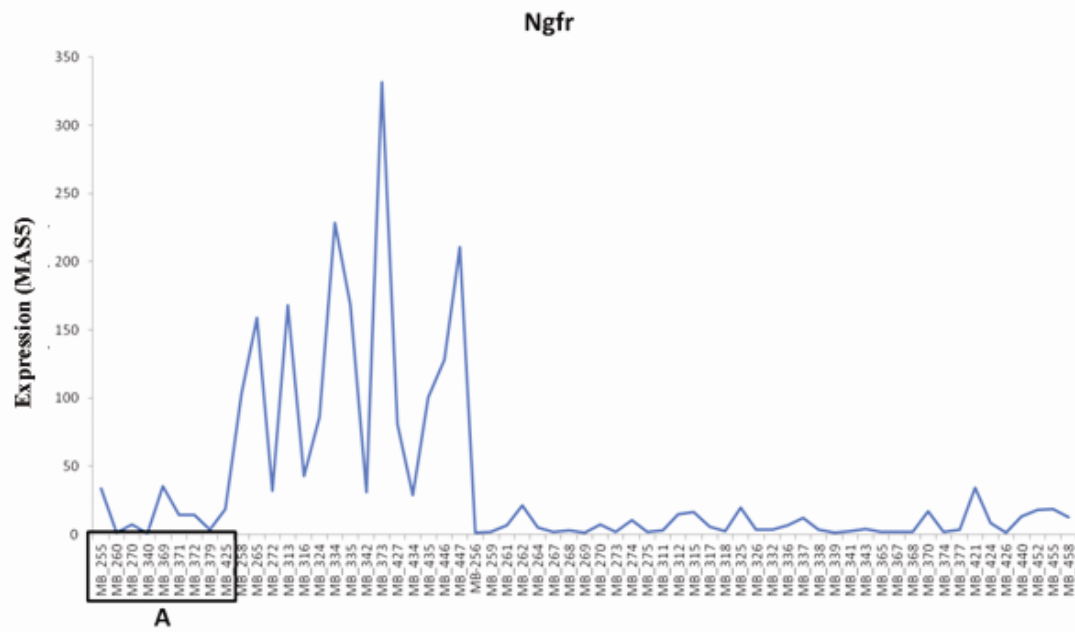

**Supplemental figure 2** NGFR expression in medulloblastoma tumours taken from previously published gene expression array data [Kool et al. 2008 (GSE10237)]. A relatively low level of expression was seen in tumors with WNT/ $\beta$ -catenin pathway activation (A).
