# Supplementary material for: WNT/β-catenin pathway activation in Myc immortalised cerebellar progenitor cells inhibits neuronal differentiation and generates tumours resembling medulloblastoma
Source: PubMed Central journal article supplement — Br J Cancer. 2012 Aug 28;107(7):1144–52. doi: 10.1038/bjc.2012.377 (PMC3461168; doi:10.1038/bjc.2012.377), 2012-08-28
Supplement: bjc2012377x3.pdf [file bjc2012377x3.pdf]

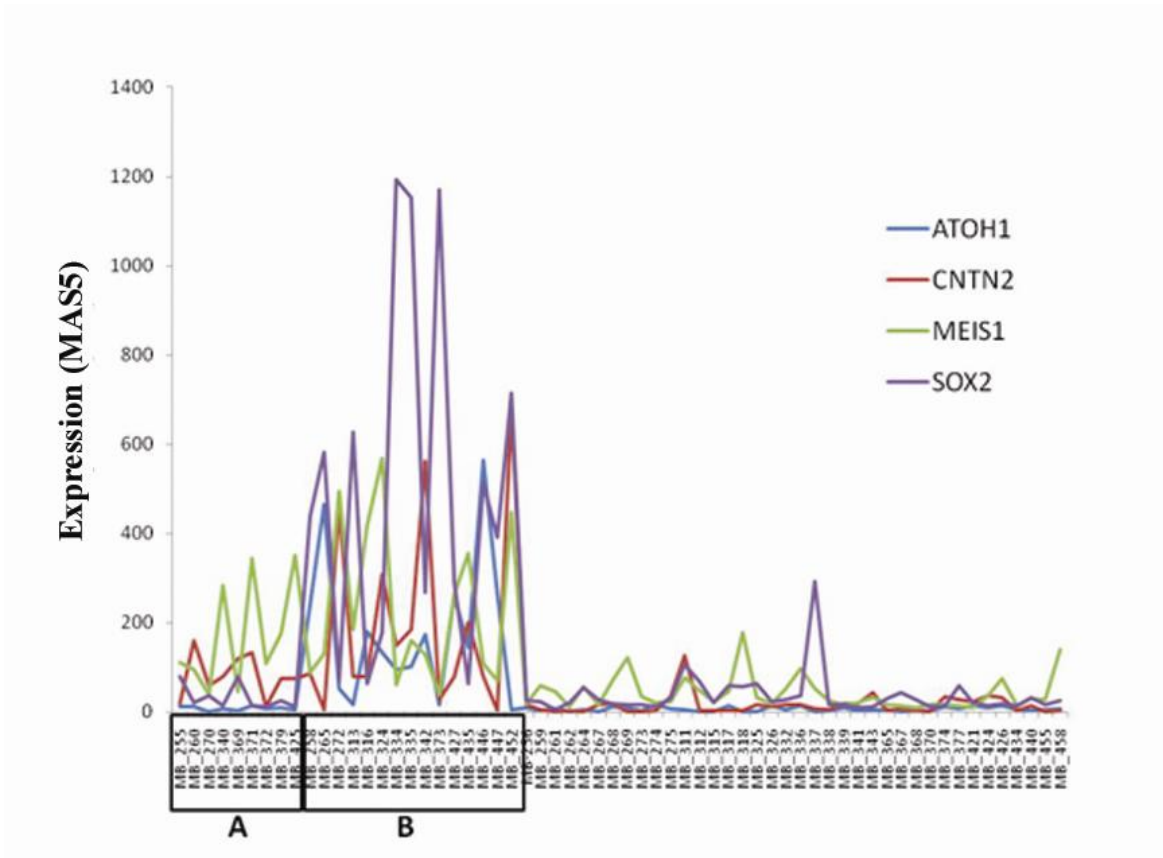

**Supplemental figure 3** Gene expression of cerebellar progenitor cells in medulloblastoma tumours, taken from previously published gene expression array data [Kool et al. 2008 (GSE10237)].

Expression of MEIS1 was seen in tumours associated with the WNT/ $\beta$ -catenin pathway (**A**) as well as the Sonic hedgehog pathway group. A high level of expression of the granule progenitor cell markers ATOH1 and CNTN2 was seen in sub-group **B** tumors which were associated with activation of the Sonic hedgehog pathway. The highest level of SOX2 expression is seen in sonic hedgehog pathway associated tumours.
